# Supplementary material
Source: Springer Nature journal article supplement (https://www.springermedizin.de/resource/supplementary/12890_2014_503_MOESM1_ESM.pdf/9505640)

Infective or other type of exacerbation

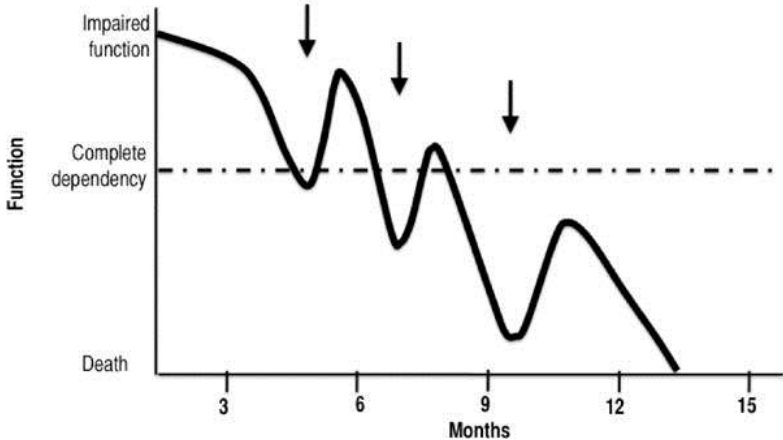

Supplement: MOESM1 [file 9505640]
